# Supplementary material for: Hepatoprotective Effect of Polyphenol-Enriched Fraction from Folium Microcos on Oxidative Stress and Apoptosis in Acetaminophen-Induced Liver Injury in Mice
Source: PubMed Central journal article supplement (PMC5463195; doi:10.1155/2017/3631565), 2017-05-23
Supplement: 3631565.f1.pdf [file 3631565.f1.pdf]

## Supplemental Data

**TABLE S1. In vitro antioxidant activities of different extracts from *Folium Microcos*.**

| Groups<br>( $\mu\text{g}/\text{mg}$ ) | DPPH Radical Scavenging Activity (%) |                     |                     |                     |                     |                     | $\text{O}_2^{\cdot-}$ Scavenging Activity (%) |                     |                    |                     |                     |                    |
|---------------------------------------|--------------------------------------|---------------------|---------------------|---------------------|---------------------|---------------------|-----------------------------------------------|---------------------|--------------------|---------------------|---------------------|--------------------|
|                                       | 10                                   | 20                  | 40                  | 80                  | 100                 | 120                 | 10                                            | 20                  | 40                 | 80                  | 100                 | 120                |
| Vc                                    | 65.55 $\pm$                          | 76.82 $\pm$         | 80.97 $\pm$         | 80.60 $\pm$         | 80.76 $\pm$         | 80.11 $\pm$         | 52.69 $\pm$                                   | 79.05 $\pm$         | 82.06 $\pm$        | 82.81 $\pm$         | 81.68 $\pm$         | 81.49 $\pm$        |
|                                       | 2.12                                 | 1.85                | 1.94                | 1.46                | 1.42                | 1.22                | 3.14                                          | 2.05                | 2.13               | 2.02                | 0.73                | 0.74               |
| FMF                                   | 41.42 $\pm$                          | 66.98 $\pm$         | 76.79 $\pm$         | 77.08 $\pm$         | 77.74 $\pm$         | 78.44 $\pm$         | 31.45 $\pm$                                   | 56.80 $\pm$         | 75.18 $\pm$        | 78.14 $\pm$         | 77.49 $\pm$         | 76.96 $\pm$        |
|                                       | 2.33 <sup>***</sup>                  | 2.24 <sup>**</sup>  | 2.29 <sup>ns</sup>  | 1.71 <sup>ns</sup>  | 1.25 <sup>ns</sup>  | 0.54 <sup>ns</sup>  | 1.39 <sup>***</sup>                           | 2.70 <sup>***</sup> | 2.40 <sup>*</sup>  | 1.12 <sup>*</sup>   | 2.09 <sup>*</sup>   | 1.79 <sup>*</sup>  |
| FME                                   | 10.87 $\pm$                          | 23.85 $\pm$         | 46.06 $\pm$         | 62.65 $\pm$         | 70.37 $\pm$         | 70.35 $\pm$         | 27.78 $\pm$                                   | 49.63 $\pm$         | 65.37 $\pm$        | 68.43 $\pm$         | 70.48 $\pm$         | 69.95 $\pm$        |
|                                       | 2.46 <sup>###</sup>                  | 2.40 <sup>###</sup> | 3.09 <sup>###</sup> | 2.97 <sup>##</sup>  | 0.94 <sup>##</sup>  | 1.21 <sup>##</sup>  | 3.07 <sup>ns</sup>                            | 2.90 <sup>#</sup>   | 3.22 <sup>#</sup>  | 3.31 <sup>###</sup> | 1.26 <sup>###</sup> | 1.04 <sup>##</sup> |
| FMW                                   | 1.50 $\pm$                           | 2.94 $\pm$          | 3.97 $\pm$          | 5.57 $\pm$          | 11.01 $\pm$         | 11.66 $\pm$         | 27.02 $\pm$                                   | 47.12 $\pm$         | 60.97 $\pm$        | 63.31 $\pm$         | 65.60 $\pm$         | 66.98 $\pm$        |
|                                       | 0.27 <sup>xxx</sup>                  | 0.29 <sup>xxx</sup> | 0.83 <sup>xxx</sup> | 1.61 <sup>xxx</sup> | 0.80 <sup>xxx</sup> | 0.57 <sup>xxx</sup> | 3.86 <sup>ns</sup>                            | 1.88 <sup>xx</sup>  | 2.63 <sup>xx</sup> | 2.87 <sup>xx</sup>  | 2.90 <sup>xx</sup>  | 1.54 <sup>xx</sup> |

Results are shown as mean  $\pm$  SD (n=3). ns, not significant, \*\*\* p < 0.001, \*\* p < 0.01, \* p < 0.05 compared with Vc group; ### p < 0.001, ## p < 0.01, # p < 0.05 compared with FMF group; xxx p < 0.001, xx p < 0.01 compared with FMF group.

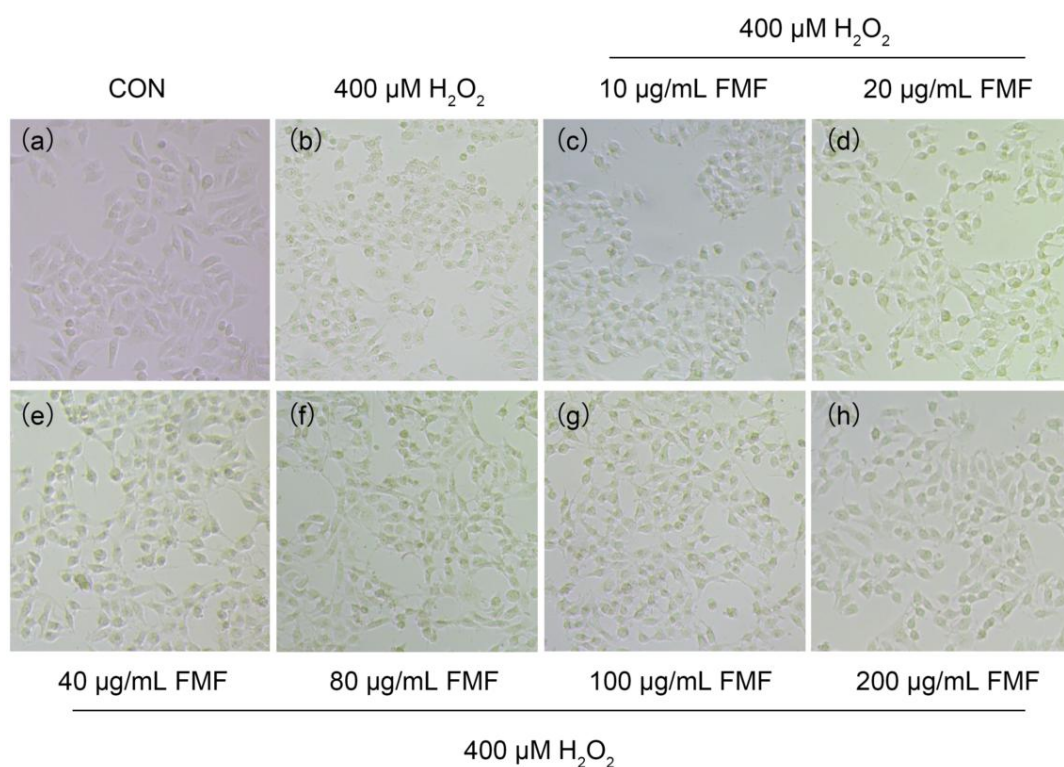

**FIGURE S1: Effects of FMF on morphological changes induced by  $\text{H}_2\text{O}_2$  in HepG2 cells.**

Cells were treated with FMF (10, 20, 40, 80, 100, and 200  $\mu\text{g}/\text{mL}$ ) in the presence of 400  $\mu\text{M}$   $\text{H}_2\text{O}_2$  for 4 h and observed by microscope. (a) Control cells. (b) Cells exposed to  $\text{H}_2\text{O}_2$ . (c-h) Cells pretreated with different doses of FMF and then exposed to  $\text{H}_2\text{O}_2$ .

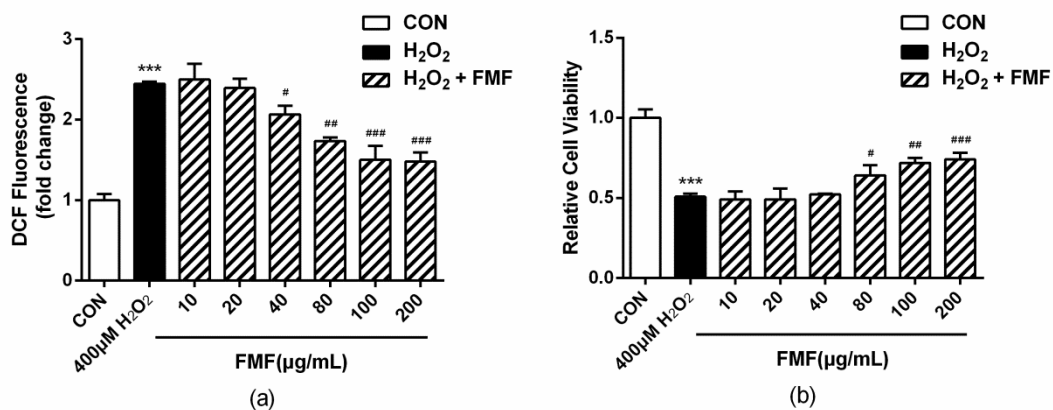

**FIGURE S2: Effects of FMF on H<sub>2</sub>O<sub>2</sub>-mediated oxidative stress in Hepa1-6 cells.** Cells were treated with FMF (10, 20, 40, 80, 100, and 200 µg/mL) in the presence of 400 µM H<sub>2</sub>O<sub>2</sub> for 4 h. (a) ROS formation was measured using a fluorescence microplate reader. (b) Cellular mortality was evaluated by MTT assay. Results are shown as mean ± SD (n=3). \*\*\* P < 0.001 compared with the control group; ### p < 0.001, ## p < 0.01, # p < 0.05 compared with H<sub>2</sub>O<sub>2</sub>-intoxicated group.

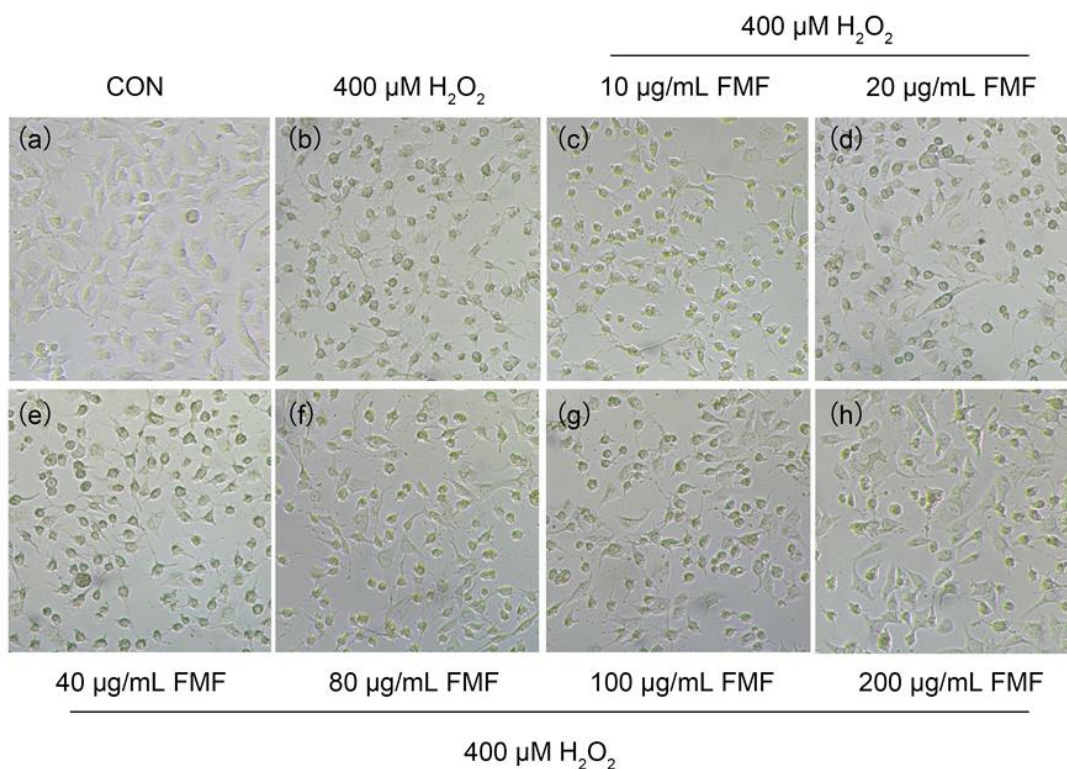

**FIGURE S3: Effects of FMF on morphological changes induced by H<sub>2</sub>O<sub>2</sub> in Hepa1-6 cells.** Cells were treated with FMF (10, 20, 40, 80, 100, and 200 µg/mL) in the presence of 400 µM H<sub>2</sub>O<sub>2</sub> for 4 h and observed by microscope. (a) Control cells. (b) Cells exposed to H<sub>2</sub>O<sub>2</sub>. (c-h) Cells

pretreated with different doses of FMF and then exposed to H<sub>2</sub>O<sub>2</sub>.

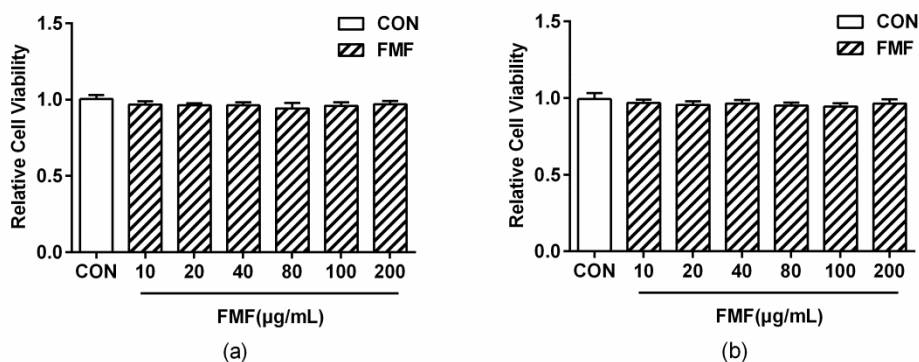

**FIGURE S4: Cytotoxicity assay.** (a) HepG2 and (b) Hepa1-6 cells were treated with FMF (10, 20, 40, 80, 100, and 200 µg/mL) for 24 h, and cellular mortality was evaluated by MTT assay.

Results are shown as mean ± SD (n=3).

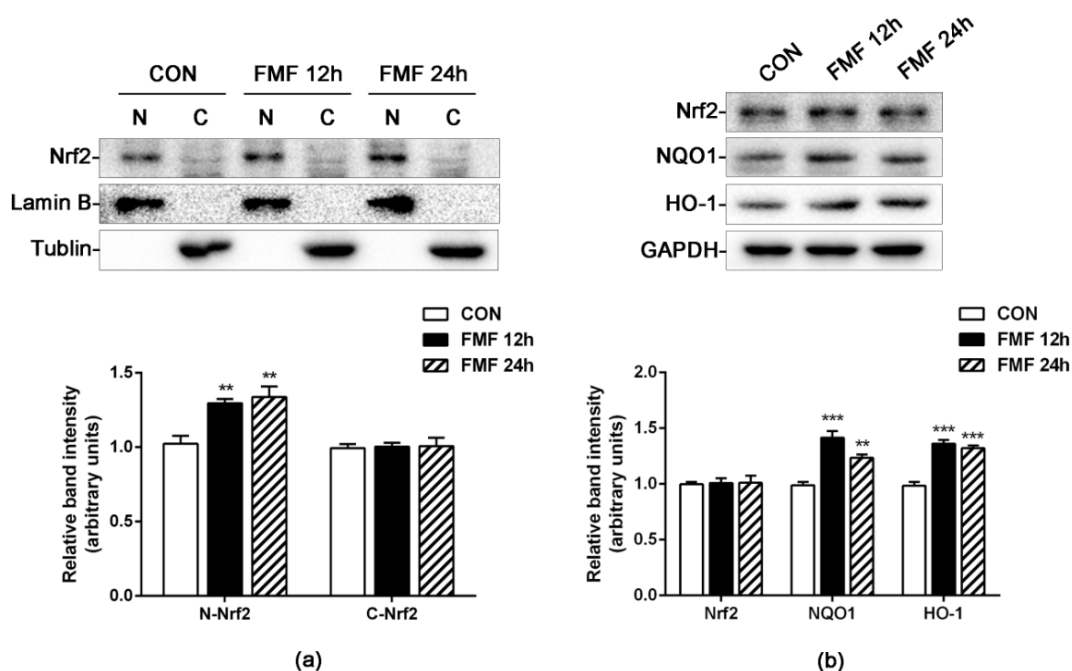

**FIGURE S5: Effects of FMF on Nrf2 nuclear translocation and its target gene expression.**

Hepa1-6 cells were treated with FMF (100 µg/mL) for 12 and 24 h. (a) Nuclear and cytoplasmic extracts of cells were prepared, and the protein level of Nrf2 was determined by western blot.

Lamin B and Tubulin were used as endogenous controls for nucleus and cytoplasm, respectively.

(b) Total cellular protein was extracted, and protein levels of Nrf2, NQO1 and HO-1 were

determined by western blot. GAPDH was used as an endogenous control. Relative intensity of the

immunoreactive bands was analyzed, and results are shown as mean  $\pm$ SD (n=3). \*\*\* p < 0.001, \*\* p < 0.01 compared with the control group.

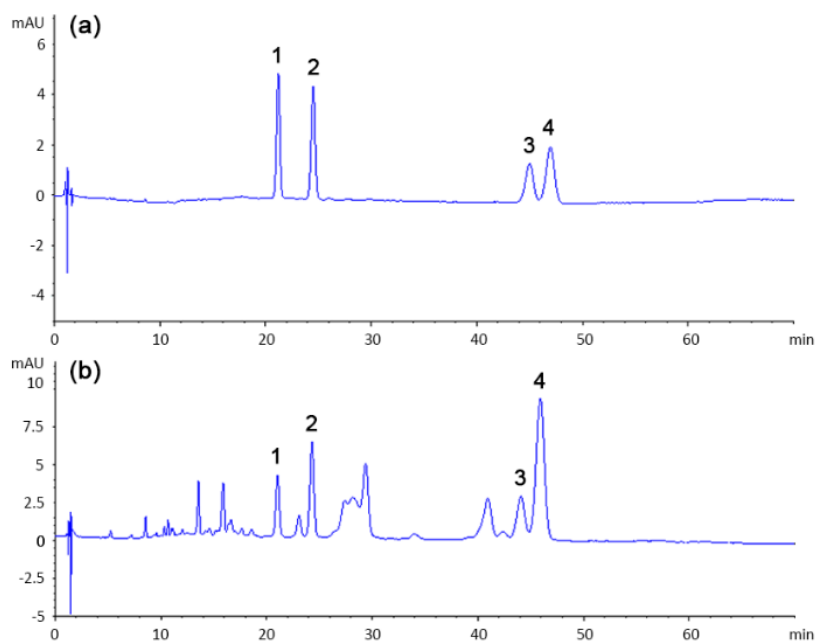

**FIGURE S6:** RP-HPLC profiles of (a) flavonoid standards and (b) flavonoid compounds in FMF at 360 nm. Peaks: 1, vitexin; 2, isovitexin; 3, isorhamnetin-3-O- $\beta$ -D-glucoside; 4, narcissin.

**TABLE S2:** Calibration curves and contents of the polyphenolic compounds in FMF from *Folium Microcos*.

| No | phenolic compound                      | content ( $\mu\text{g}/\text{mg}$ ) | $t_R$ (min)      | equation of regression<br>( $Y = aX + b$ ) | $R^2$  |
|----|----------------------------------------|-------------------------------------|------------------|--------------------------------------------|--------|
| 1  | vitexin                                | 10.37                               | $21.27 \pm 0.25$ | $Y = 1744.0X + 16.472$                     | 0.9997 |
| 2  | isovitexin                             | 10.56                               | $24.60 \pm 0.21$ | $Y = 3302.9X - 17.259$                     | 0.9995 |
| 3  | isorhamnetin-3-O- $\beta$ -D-glucoside | 11.30                               | $45.30 \pm 0.26$ | $Y = 3038.2X + 39.04$                      | 0.9994 |
| 4  | narcissin                              | 62.38                               | $47.21 \pm 0.32$ | $Y = 1963.9X + 7.5613$                     | 0.9993 |
